# Supplementary figures and images for: A low cost virtual reality system for home based rehabilitation of the arm following stroke: a randomised controlled feasibility trial
Source: PubMed Central journal article supplement — Clin Rehabil. 2016 Jul 10;31(3):340–50. doi: 10.1177/0269215516640320 (PMC5349317; doi:10.1177/0269215516640320), 2016-07-10

Figure 1 The virtual glove

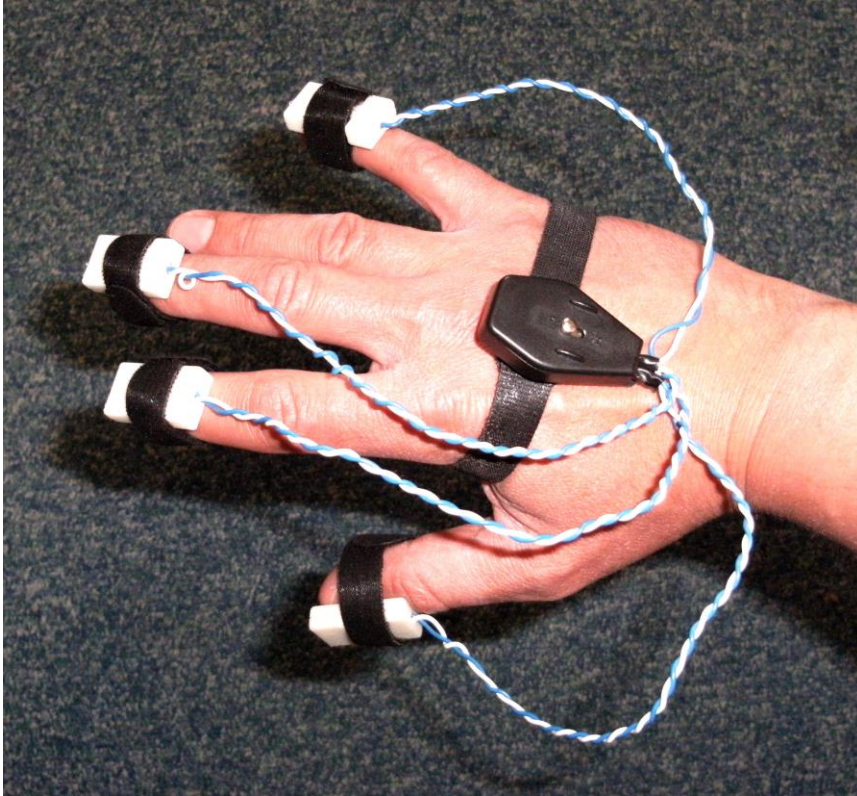

Supplement: CRE640320_supplementary.pdf [file CRE640320_supplementary.pdf]
